# Supplementary material for: Usability Testing of the BRANCH Smartphone App Designed to Reduce Harmful Drinking in Young Adults
Source: PubMed Central journal article supplement (PMC5566629; doi:10.2196/mhealth.7836), 2017-08-08

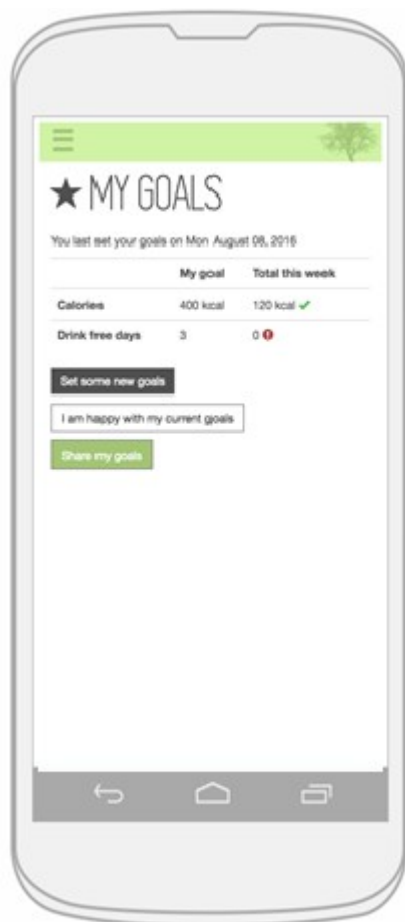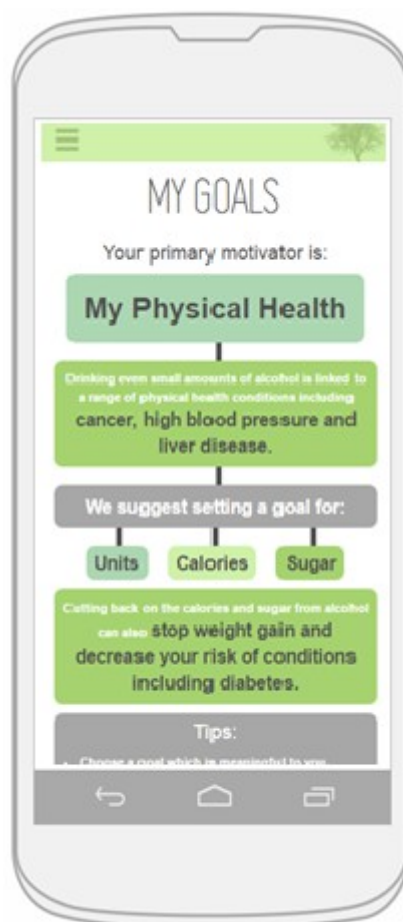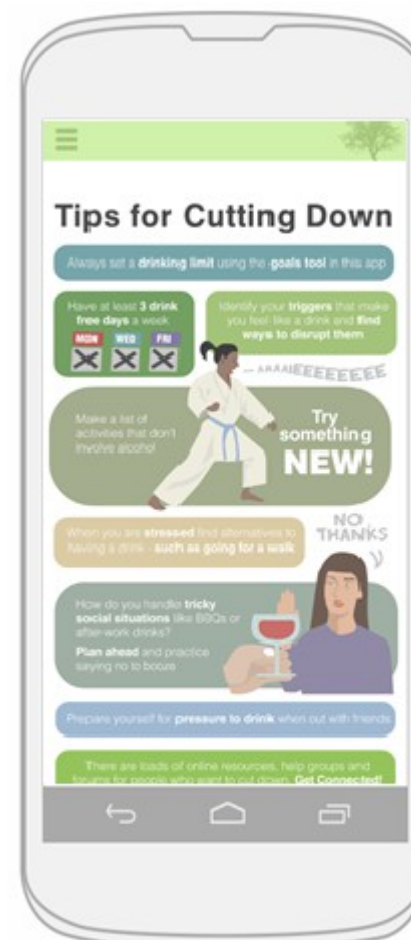

Supplement: mhealth_v5i8e109_app2.pdf [file mhealth_v5i8e109_app2.pdf]
