# Supplementary material for: Usability Testing of the BRANCH Smartphone App Designed to Reduce Harmful Drinking in Young Adults
Source: PubMed Central journal article supplement (PMC5566629; doi:10.2196/mhealth.7836), 2017-08-08
Supplement: mhealth_v5i8e109_app4.pdf [file mhealth_v5i8e109_app4.pdf]

| <b>Type of message</b>         | <b>Message</b>                                                                                                          |
|--------------------------------|-------------------------------------------------------------------------------------------------------------------------|
| Encouragement to set a goal    | Start to take control of how much you are spending on alcohol: Set a cost goal today                                    |
| Praise when goal is set        | Well done for setting a cost goal - you're in control now!                                                              |
| Motivation during goal         | Remember your cost goal. Don't lose momentum now!                                                                       |
| End of goal message (success)  | Congratulations on reaching your costs goal - why don't you set your next goal now?                                     |
| End of goal message (failure)  | Oh dear, it looks like you didn't achieve your cost goal. Don't despair, set another goal now, you'll get it next time! |
| Motivational message (general) | Do you think your drinking is a positive part of your lifestyle?                                                        |
| Did you know?                  | We all have tough moments, keep at it!                                                                                  |
| Tip                            | Make plans for early mornings on weekends                                                                               |
